# Supplementary material for: A near-ideal color rendering white solid-state lighting device copackaged with two color-separated Cu–X–S (X = Ga, In) quantum dot emitters
Source: Royal Society of Chemistry journal article supplement (doi:10.1039/c7tc01875d), 2017-01-01
Supplement: c7tc01875d1.pdf [file c7tc01875d1.pdf]

## Electronic Supplementary Information (ESI)

# Near-ideal color rendering white solid-state lighting device copackaged with two color-separated Cu–X–S (X = Ga, In) quantum dot emitters

Jong-Hoon Kim,<sup>a,†</sup> Bu-Yong Kim,<sup>a,†</sup> Eun-Pyo Jang,<sup>a</sup> Chang-Yeol Han,<sup>a</sup> Jung-Ho Jo,<sup>a</sup> Young  
Rag Do<sup>b</sup> and Heesun Yang<sup>\*a</sup>

<sup>a</sup> Department of Materials Science and Engineering, Hongik University, Seoul 121-791,  
Republic of Korea. \*E-mail: hyang@hongik.ac.kr

<sup>b</sup> Department of Chemistry, Kookmin University, Seoul 136-702, Republic of Korea

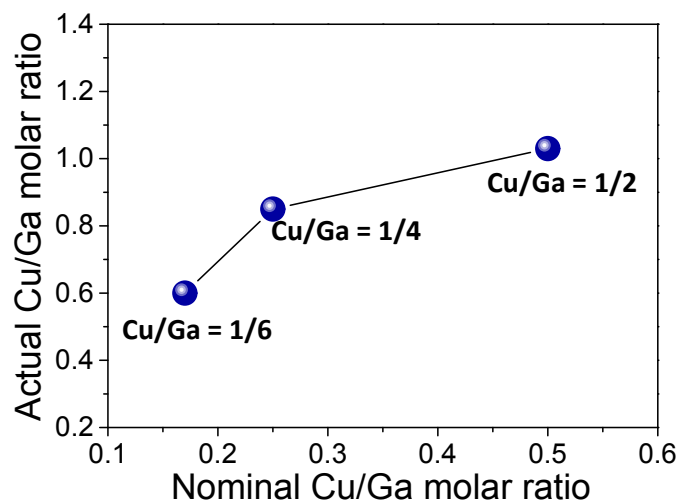

**Fig. S1** Nominal *versus* actual Cu/Ga ratios of a series of CGS/ZnS QDs.

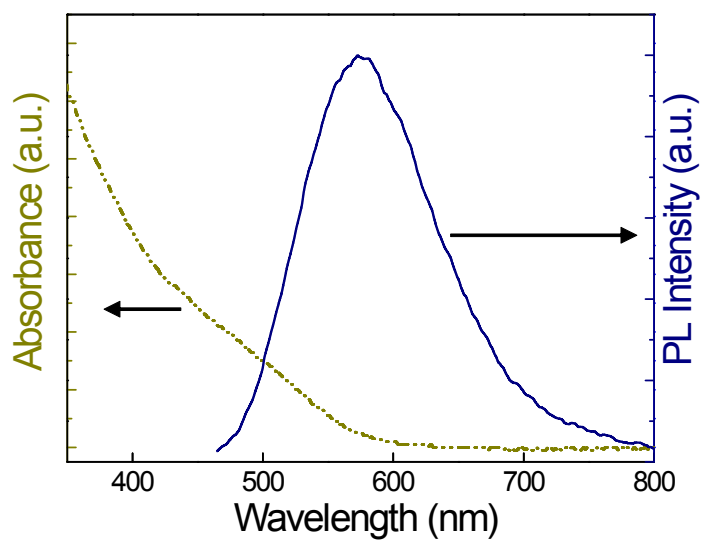

**Fig. S2** Absorption and PL spectra of CIS/ZnS QDs obtained after triple ZnS shelling was applied.

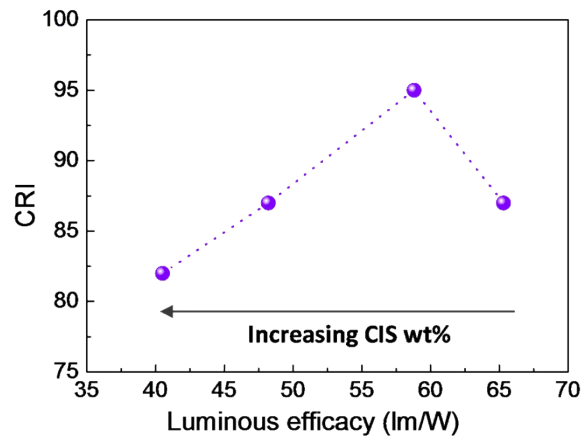

**Fig. S3** Device efficacy–CRI relation replotted from Fig. 3(c).

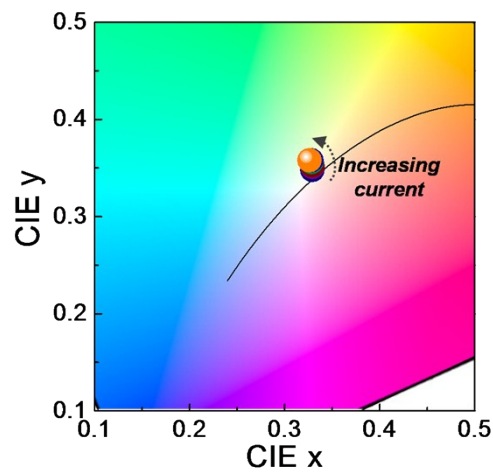

**Fig. S4** Variation of CIE color coordinates of 2.9 wt% CIS-based white QD-LED with increasing applied current from 20 to 300 mA.

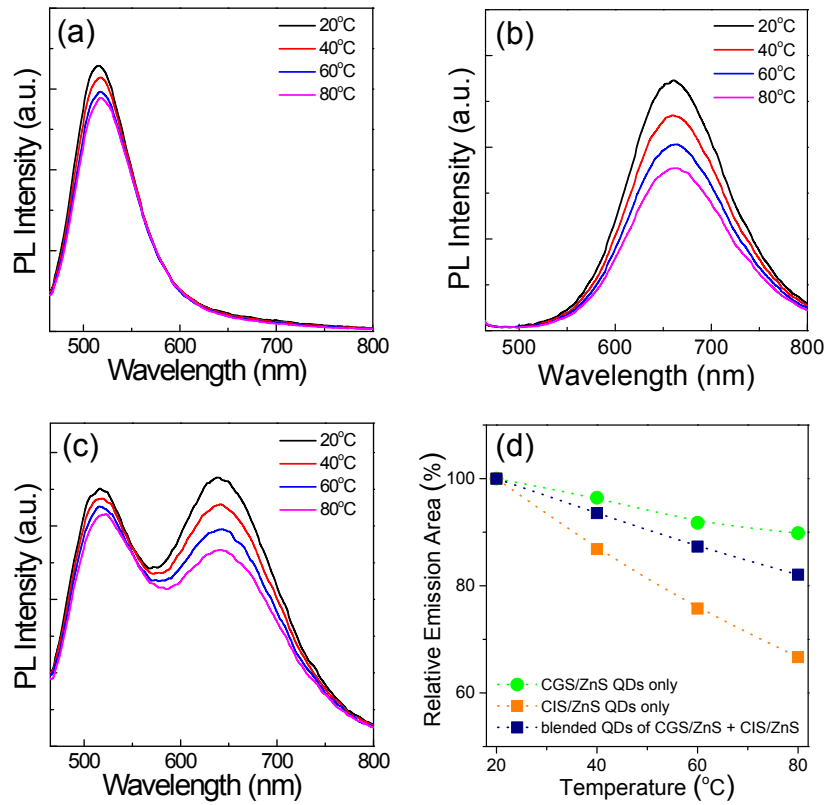

**Fig. S5** Changes of PL intensity of QD-resin mixture on glass substrate with increasing heating temperature from 20 to 100°C: (a) CGS/ZnS QDs only, (b) CIS/ZnS QDs only, and (c) blended QDs of CGS/ZnS + CIS/ZnS. (d) Summarized thermal quenching plot for the respective samples.

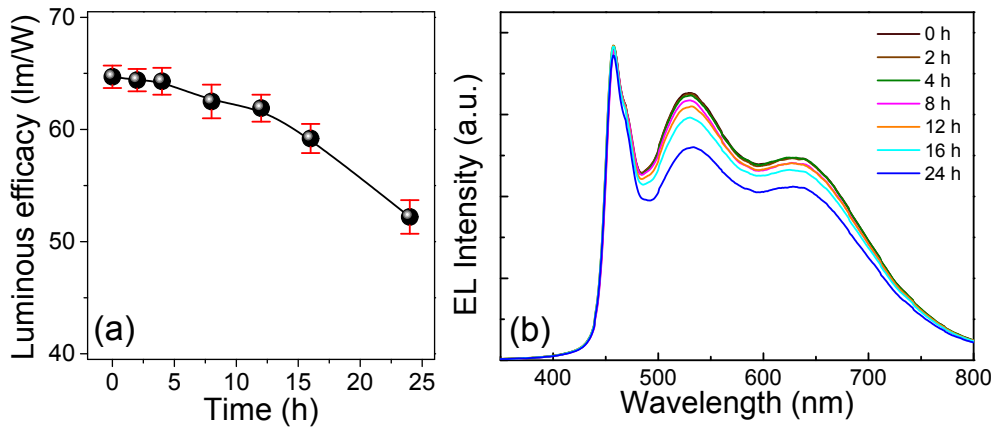

**Fig. S6** (a) Device operational time-dependent variation in luminous efficacy and (b) temporal evolution of EL spectra of 2.9 wt% CIS-based white QD-LED under 60 mA driving current. The error bars in (a) represent repeated measurements of three devices.

**Table S1.** Variations of luminous efficacy, CIE color coordinates, CRI, and CCT of white QD-LEDs fabricated with different weight ratios between CGS and CIS QDs at an operating current of 100 mA.

| Sample      | Luminous efficacy (lm/W) | CIE x | CIE y | CRI | CCT (K) |
|-------------|--------------------------|-------|-------|-----|---------|
| 2 wt% CIS   | 65.3                     | 0.290 | 0.349 | 87  | 7582    |
| 2.9 wt% CIS | 58.8                     | 0.329 | 0.353 | 95  | 5654    |
| 3.8 wt% CIS | 48.2                     | 0.349 | 0.340 | 87  | 4810    |
| 4.8 wt% CIS | 40.5                     | 0.355 | 0.330 | 82  | 4486    |

**Table S2.** Driving current-dependent variations of luminous efficacy, CIE color coordinates, CRI, and CCT of 2.9 wt% CIS-based white QD-LED.

| Current (mA) | Luminous efficacy (lm/W) | CIE x | CIE y | CRI | CCT (K) |
|--------------|--------------------------|-------|-------|-----|---------|
| 20           | 68.8                     | 0.329 | 0.348 | 94  | 5654    |
| 60           | 64.9                     | 0.329 | 0.351 | 94  | 5651    |
| 100          | 58.8                     | 0.329 | 0.353 | 95  | 5654    |
| 150          | 53.7                     | 0.328 | 0.356 | 96  | 5686    |
| 200          | 50.2                     | 0.328 | 0.357 | 96  | 5686    |
| 250          | 47.2                     | 0.328 | 0.358 | 96  | 5719    |
| 300          | 43.1                     | 0.326 | 0.358 | 97  | 5752    |
